# Supplementary material for: Relationships between ICT Use for Task and Social Functions, Work Characteristics, and Employee Task Proficiency and Job Satisfaction: Does Age Matter?
Source: MDPI journal article supplement (doi:10.3390/merits2030016), 2022-08-30
Supplement: s1 [file s1]

**Online supplemental material to accompany:**

(Blinded for review)

Table S1

*Descriptive statistics for industry*

|                                                                                                                                                              | Frequency | Percent |
|--------------------------------------------------------------------------------------------------------------------------------------------------------------|-----------|---------|
| Agriculture, forestry and fishing                                                                                                                            | 17        | 1.0     |
| Mining and quarrying                                                                                                                                         | 11        | .6      |
| Manufacturing                                                                                                                                                | 221       | 12.5    |
| Energy supply                                                                                                                                                | 29        | 1.6     |
| Water supply; sewerage, waste management and remediation activities                                                                                          | 12        | .7      |
| Construction                                                                                                                                                 | 75        | 4.3     |
| Wholesale and retail trade; repair of motor vehicles and motorcycles                                                                                         | 115       | 6.5     |
| Transportation and warehousing                                                                                                                               | 104       | 5.9     |
| Hotels and restaurants                                                                                                                                       | 39        | 2.2     |
| Information and communication                                                                                                                                | 99        | 5.6     |
| Financial and insurance activities                                                                                                                           | 76        | 4.3     |
| Real estate and housing activities                                                                                                                           | 18        | 1.0     |
| Professional, scientific and technical activities                                                                                                            | 88        | 5.0     |
| Other business activities                                                                                                                                    | 97        | 5.5     |
| Public administration and defense; compulsory social security                                                                                                | 203       | 11.5    |
| Education                                                                                                                                                    | 120       | 6.8     |
| Health care and social work activities                                                                                                                       | 203       | 11.5    |
| Arts, entertainment and recreation                                                                                                                           | 44        | 2.5     |
| Other service activities                                                                                                                                     | 166       | 9.4     |
| Activities of private households as employers of domestic staff; undifferentiated goods- and services-producing activities of private households for own use | 11        | .6      |
| Extra-territorial organizations and bodies                                                                                                                   | 13        | .7      |
| Total                                                                                                                                                        | 1761      | 100.0   |

Table S2

*Descriptive statistics for substantive variables for complete and incomplete responses*

|                                   | Complete Response |         |         |        |                   |      |         |         |        |                   |
|-----------------------------------|-------------------|---------|---------|--------|-------------------|------|---------|---------|--------|-------------------|
|                                   | no                |         |         |        |                   | yes  |         |         |        |                   |
|                                   | N                 | Minimum | Maximum | Mean   | Std.<br>Deviation | N    | Minimum | Maximum | Mean   | Std.<br>Deviation |
| Age (T1)                          | 233               | 20      | 69      | 41.94  | 12.373            | 1528 | 19      | 70      | 44.36  | 11.804            |
| ICT use for task functions (T1)   | 233               | 1       | 5       | 3.73   | 1.314             | 1528 | 1       | 5       | 3.64   | 1.374             |
| ICT use for social functions (T1) | 233               | 1       | 5       | 3.72   | 1.302             | 1528 | 1       | 5       | 3.63   | 1.329             |
| Job Autonomy (T2)                 | 233               | 1.00    | 5.00    | 2.9235 | 0.96824           | 1528 | 1.00    | 5.00    | 2.9364 | 1.10973           |
| Team Cohesion (T2)                | 233               | 1.00    | 5.00    | 3.5780 | 1.03876           | 1528 | 1.00    | 5.00    | 3.6145 | 0.98610           |
| Task Significance (T2)            | 233               | 1.00    | 5.00    | 3.3405 | 0.99734           | 1528 | 1.00    | 5.00    | 3.2493 | 1.04033           |
| Task Proficiency (T3)             | 0                 |         |         |        |                   | 1528 | 1.00    | 5.00    | 4.2269 | 0.74979           |
| Job Satisfaction (T3)             | 0                 |         |         |        |                   | 1526 | 1       | 5       | 3.51   | 0.988             |

Table S3

*Descriptive statistics of sex for complete and incomplete responses*

|        | Complete Response |         |           |         |
|--------|-------------------|---------|-----------|---------|
|        | no                |         | yes       |         |
|        | Frequency         | Percent | Frequency | Percent |
| Male   | 118               | 50.6    | 899       | 58.8    |
| Female | 115               | 49.4    | 629       | 41.2    |
| Total  | 233               | 100.0   | 1528      | 100.0   |

Table S4

*Descriptive statistics of occupational education for complete and incomplete responses*

|                               | Complete Response |         |                    |           |         |                    |
|-------------------------------|-------------------|---------|--------------------|-----------|---------|--------------------|
|                               | no                |         |                    | yes       |         |                    |
|                               | Frequency         | Percent | Cumulative Percent | Frequency | Percent | Cumulative Percent |
| No Occupational Qualification | 9                 | 3.9     | 3.9                | 54        | 3.5     | 3.5                |
| Vocational Training           | 103               | 44.2    | 48.1               | 747       | 48.9    | 52.4               |
| Technical College Degree      | 27                | 11.6    | 59.7               | 169       | 11.1    | 63.5               |
| Bachelor                      | 29                | 12.4    | 72.1               | 133       | 8.7     | 72.2               |
| Master/Diploma                | 51                | 21.9    | 94.0               | 369       | 24.1    | 96.3               |
| PhD                           | 6                 | 2.6     | 96.6               | 23        | 1.5     | 97.8               |
| Other                         | 8                 | 3.4     | 100.0              | 33        | 2.2     | 100.0              |
| Total                         | 233               | 100.0   |                    | 1528      | 100.0   |                    |

Table S5

*Descriptive statistics of industry for complete and incomplete responses*

|                                                                                                                                                              | Complete Response |         |                    |           |         |                    |
|--------------------------------------------------------------------------------------------------------------------------------------------------------------|-------------------|---------|--------------------|-----------|---------|--------------------|
|                                                                                                                                                              | no                |         |                    | yes       |         |                    |
|                                                                                                                                                              | Frequency         | Percent | Cumulative Percent | Frequency | Percent | Cumulative Percent |
| Agriculture, forestry and fishing                                                                                                                            | 1                 | .4      | .4                 | 16        | 1.0     | 1.0                |
| Mining and quarrying                                                                                                                                         | 1                 | .4      | .9                 | 10        | .7      | 1.7                |
| Manufacturing                                                                                                                                                | 25                | 10.7    | 11.6               | 196       | 12.8    | 14.5               |
| Energy supply                                                                                                                                                | 2                 | .9      | 12.4               | 27        | 1.8     | 16.3               |
| Water supply; sewerage, waste management and remediation activities                                                                                          | 2                 | .9      | 13.3               | 10        | .7      | 17.0               |
| Construction                                                                                                                                                 | 10                | 4.3     | 17.6               | 65        | 4.3     | 21.2               |
| Wholesale and retail trade; repair of motor vehicles and motorcycles                                                                                         | 11                | 4.7     | 22.3               | 104       | 6.8     | 28.0               |
| Transportation and warehousing                                                                                                                               | 12                | 5.2     | 27.5               | 92        | 6.0     | 34.0               |
| Hotels and restaurants                                                                                                                                       | 7                 | 3.0     | 30.5               | 32        | 2.1     | 36.1               |
| Information and communication                                                                                                                                | 12                | 5.2     | 35.6               | 87        | 5.7     | 41.8               |
| Financial and insurance activities                                                                                                                           | 11                | 4.7     | 40.3               | 65        | 4.3     | 46.1               |
| Real estate and housing activities                                                                                                                           | 3                 | 1.3     | 41.6               | 15        | 1.0     | 47.1               |
| Professional, scientific and technical activities                                                                                                            | 8                 | 3.4     | 45.1               | 80        | 5.2     | 52.3               |
| Other business activities                                                                                                                                    | 18                | 7.7     | 52.8               | 79        | 5.2     | 57.5               |
| Public administration and defense; compulsory social security                                                                                                | 22                | 9.4     | 62.2               | 181       | 11.8    | 69.3               |
| Education                                                                                                                                                    | 22                | 9.4     | 71.7               | 98        | 6.4     | 75.7               |
| Health care and social work activities                                                                                                                       | 32                | 13.7    | 85.4               | 171       | 11.2    | 86.9               |
| Arts, entertainment and recreation                                                                                                                           | 10                | 4.3     | 89.7               | 34        | 2.2     | 89.1               |
| Other service activities                                                                                                                                     | 20                | 8.6     | 98.3               | 146       | 9.6     | 98.7               |
| Activities of private households as employers of domestic staff; undifferentiated goods- and services-producing activities of private households for own use | -                 | -       | -                  | 11        | .7      | 99.4               |
| Extra-territorial organizations and bodies                                                                                                                   | 4                 | 1.7     | 100.0              | 9         | .6      | 100.0              |
| Total                                                                                                                                                        | 233               | 100.0   |                    | 1528      | 100.0   |                    |

*Mplus* code of the moderated mediation model (M2)

**VARIABLE:**

Names =  
 W !age  
 X X2 !ICT use for task/social function  
 T1M1 T1M2 T1M3 !job autonomy, team cohesion, task significance at T1  
 M1 M2 M3 !job autonomy, team cohesion, task significance at T2  
 T2Y T2Y2 !task proficiency, job satisfaction at T2  
 Y Y2 !task proficiency, job satisfaction at T3

**DEFINE:**

center X X2 M1 M2 M3 W (grandmean);

M1W = M1\*W; M2W = M2\*W; M3W = M3\*W; XW = X\*W; X2W = X2\*W;

**ANALYSIS:**

type = general; estimator = ml; bootstrap = 5000;

**MODEL:**

Y ON M1 (b11); Y ON M2 (b12); Y ON M3 (b13); Y ON W (b2);  
 Y ON M1W (b31); Y ON M2W (b32); Y ON M3W (b33);

Y ON X (cdash); Y ON X2 (cdash2);  
 Y ON T2y; !Autoregression Y1

Y2 ON M1 (d11); Y2 ON M2 (d12); Y2 ON M3 (d13); Y2 ON W (d2);  
 Y2 ON M1W (d31); Y2 ON M2W (d32); Y2 ON M3W (d33);

Y2 ON X (edash); Y2 ON X2 (edash2);  
 Y2 ON T2y2; !Autoregression Y2

M1 ON X (a11) X2 (a21); M1 ON W (a31); M1 ON XW (a41); M1 ON X2W (a51);  
 M1 ON T1m1; !Autoregression

M2 ON X (a12) X2 (a22); M2 ON W (a32); M2 ON XW (a42); M2 ON X2W (a52);  
 M2 ON T1m2; !Autoregression

M3 ON X (a13) X2 (a23); M3 ON W (a33); M3 ON XW (a43); M3 ON X2W (a53);  
 M3 ON T1m3; !Autoregression

X WITH X2 T1m1 T1m2 T1m3 W; X2 WITH T1m1 T1m2 T1m3 W; T1m1 WITH T1m2 T1m3 W;  
 T1m2 WITH T1m3 W; T1m3 WITH W;

M1 WITH M2 M3 T2y T2y2; M2 WITH M3 T2y T2y2; M3 WITH T2y T2y2; T2y WITH T2y2;  
 Y WITH Y2;

**MODEL CONSTRAINT:**

NEW (LOW\_W MED\_W HIGH\_W IND1\_LOW W IND1\_MED W IND1\_HI W IND2\_LOW W  
 IND2\_MED W IND2\_HI W IND3\_LOW W IND3\_MED W IND3\_HI W TOT1\_LOW W TOT1\_MED W  
 TOT1\_HI W IND4\_LOW W IND4\_MED W IND4\_HI W IND5\_LOW W IND5\_MED W IND5\_HI W  
 IND6\_LOW W IND6\_MED W IND6\_HI W TOT2\_LOW W TOT2\_MED W TOT2\_HI W IND12\_LOW W  
 IND12\_MED W IND12\_HI W IND22\_LOW W IND22\_MED W IND22\_HI W IND32\_LOW W  
 IND32\_MED W IND32\_HI W TOT12\_LOW W TOT12\_MED W TOT12\_HI W IND42\_LOW W  
 IND42\_MED W IND42\_HI W IND52\_LOW W IND52\_MED W IND52\_HI W IND62\_LOW W  
 IND62\_MED W IND62\_HI W TOT22\_LOW W TOT22\_MED W TOT22\_HI W);

LOW\_W = -12.03;      ! 1 SD below the average of Age  
 MED\_W = 0;      ! Average of Age  
 HIGH\_W = 12.03;      ! 1 SD above the average of Age

### ! ICT use for task functions

! Y1 - Mediator 1 - Calc conditional indirect effects for each combination of moderator

IND1\_LOWW = a11\*b11 + a41\*b11\*LOW\_W + a11\*b31\*LOW\_W + a41\*b31\*LOW\_W\*LOW\_W;  
 IND1\_MEDW = a11\*b11 + a41\*b11\*MED\_W + a11\*b31\*MED\_W + a41\*b31\*MED\_W\*MED\_W;  
 IND1\_HIW = a11\*b11 + a41\*b11\*HIGH\_W + a11\*b31\*HIGH\_W + a41\*b31\*HIGH\_W\*HIGH\_W;

! Y1 - Mediator 2 - Calc conditional indirect effects for each combination of moderator

IND2\_LOWW = a12\*b12 + a42\*b12\*LOW\_W + a12\*b32\*LOW\_W + a42\*b32\*LOW\_W\*LOW\_W;  
 IND2\_MEDW = a12\*b12 + a42\*b12\*MED\_W + a12\*b32\*MED\_W + a42\*b32\*MED\_W\*MED\_W;  
 IND2\_HIW = a12\*b12 + a42\*b12\*HIGH\_W + a12\*b32\*HIGH\_W + a42\*b32\*HIGH\_W\*HIGH\_W;

! Y1 - Mediator 3 - Calc conditional indirect effects for each combination of moderator

IND3\_LOWW = a13\*b13 + a43\*b13\*LOW\_W + a13\*b33\*LOW\_W + a43\*b33\*LOW\_W\*LOW\_W;  
 IND3\_MEDW = a13\*b13 + a43\*b13\*MED\_W + a13\*b33\*MED\_W + a43\*b33\*MED\_W\*MED\_W;  
 IND3\_HIW = a13\*b13 + a43\*b13\*HIGH\_W + a13\*b33\*HIGH\_W + a43\*b33\*HIGH\_W\*HIGH\_W;

! Y ON X - Calc conditional total effects for each combination of moderator values

TOT1\_LOWW = IND1\_LOWW + IND2\_LOWW + IND3\_LOWW + cdash;  
 TOT1\_MEDW = IND1\_MEDW + IND2\_MEDW + IND3\_MEDW + cdash;  
 TOT1\_HIW = IND1\_HIW + IND2\_HIW + IND3\_HIW + cdash;

! Y2 - Mediator 1 - Calc conditional indirect effects for each combination of moderator

IND4\_LOWW = a11\*d11 + a41\*d11\*LOW\_W + a11\*d31\*LOW\_W + a41\*d31\*LOW\_W\*LOW\_W;  
 IND4\_MEDW = a11\*d11 + a41\*d11\*MED\_W + a11\*d31\*MED\_W + a41\*d31\*MED\_W\*MED\_W;  
 IND4\_HIW = a11\*d11 + a41\*d11\*HIGH\_W + a11\*d31\*HIGH\_W + a41\*d31\*HIGH\_W\*HIGH\_W;

! Y2 - Mediator 2 - Calc conditional indirect effects for each combination of moderator

IND5\_LOWW = a12\*d12 + a42\*d12\*LOW\_W + a12\*d32\*LOW\_W + a42\*d32\*LOW\_W\*LOW\_W;  
 IND5\_MEDW = a12\*d12 + a42\*d12\*MED\_W + a12\*d32\*MED\_W + a42\*d32\*MED\_W\*MED\_W;  
 IND5\_HIW = a12\*d12 + a42\*d12\*HIGH\_W + a12\*d32\*HIGH\_W + a42\*d32\*HIGH\_W\*HIGH\_W;

! Y2 - Mediator 3 - Calc conditional indirect effects for each combination of moderator

IND6\_LOWW = a13\*d13 + a43\*d13\*LOW\_W + a13\*d33\*LOW\_W + a43\*d33\*LOW\_W\*LOW\_W;  
 IND6\_MEDW = a13\*d13 + a43\*d13\*MED\_W + a13\*d33\*MED\_W + a43\*d33\*MED\_W\*MED\_W;  
 IND6\_HIW = a13\*d13 + a43\*d13\*HIGH\_W + a13\*d33\*HIGH\_W + a43\*d33\*HIGH\_W\*HIGH\_W;

! Y2 ON X - Calc conditional total effects for each combination of moderator value

TOT2\_LOWW = IND4\_LOWW + IND5\_LOWW + IND6\_LOWW + edash;  
 TOT2\_MEDW = IND4\_MEDW + IND5\_MEDW + IND6\_MEDW + edash;  
 TOT2\_HIW = IND4\_HIW + IND5\_HIW + IND6\_HIW + edash;

### ! ICT use for social functions

! Y1 - Mediator 1 - Calc conditional indirect effects for each combination of moderator

IND12\_LOWW = a21\*b11 + a51\*b11\*LOW\_W + a21\*b31\*LOW\_W + a51\*b31\*LOW\_W\*LOW\_W;  
 IND12\_MEDW = a21\*b11 + a51\*b11\*MED\_W + a21\*b31\*MED\_W + a51\*b31\*MED\_W\*MED\_W;  
 IND12\_HIW = a21\*b11 + a51\*b11\*HIGH\_W + a21\*b31\*HIGH\_W + a51\*b31\*HIGH\_W\*HIGH\_W;

! Y1 - Mediator 2 - Calc conditional indirect effects for each combination of moderator

IND22\_LOWW = a22\*b12 + a52\*b12\*LOW\_W + a22\*b32\*LOW\_W + a52\*b32\*LOW\_W\*LOW\_W;  
 IND22\_MEDW = a22\*b12 + a52\*b12\*MED\_W + a22\*b32\*MED\_W + a52\*b32\*MED\_W\*MED\_W;  
 IND22\_HIW = a22\*b12 + a52\*b12\*HIGH\_W + a22\*b32\*HIGH\_W + a52\*b32\*HIGH\_W\*HIGH\_W;

! Y1 - Mediator 3 - Calc conditional indirect effects for each combination of moderator

$IND32\_LOWW = a23*b13 + a53*b13*LOW\_W + a23*b33*LOW\_W + a53*b33*LOW\_W*LOW\_W;$

$IND32\_MEDW = a23*b13 + a53*b13*MED\_W + a23*b33*MED\_W + a53*b33*MED\_W*MED\_W;$

$IND32\_HIW = a23*b13 + a53*b13*HIGH\_W + a23*b33*HIGH\_W + a53*b33*HIGH\_W*HIGH\_W;$

! Y ON X - Calc conditional total effects for each combination of moderator values

$TOT12\_LOWW = IND12\_LOWW + IND22\_LOWW + IND32\_LOWW + cdash2;$

$TOT12\_MEDW = IND12\_MEDW + IND22\_MEDW + IND32\_MEDW + cdash2;$

$TOT12\_HIW = IND12\_HIW + IND22\_HIW + IND32\_HIW + cdash2;$

! Y2 - Mediator 1 - Calc conditional indirect effects for each combination of moderator

$IND42\_LOWW = a21*d11 + a51*d11*LOW\_W + a21*d31*LOW\_W + a51*d31*LOW\_W*LOW\_W;$

$IND42\_MEDW = a21*d11 + a51*d11*MED\_W + a21*d31*MED\_W + a51*d31*MED\_W*MED\_W;$

$IND42\_HIW = a21*d11 + a51*d11*HIGH\_W + a21*d31*HIGH\_W + a51*d31*HIGH\_W*HIGH\_W;$

! Y2 - Mediator 2 - Calc conditional indirect effects for each combination of moderator

$IND52\_LOWW = a22*d12 + a52*d12*LOW\_W + a22*d32*LOW\_W + a52*d32*LOW\_W*LOW\_W;$

$IND52\_MEDW = a22*d12 + a52*d12*MED\_W + a22*d32*MED\_W + a52*d32*MED\_W*MED\_W;$

$IND52\_HIW = a22*d12 + a52*d12*HIGH\_W + a22*d32*HIGH\_W + a52*d32*HIGH\_W*HIGH\_W;$

! Y2 - Mediator 3 - Calc conditional indirect effects for each combination of moderator

$IND62\_LOWW = a23*d13 + a53*d13*LOW\_W + a23*d33*LOW\_W + a53*d33*LOW\_W*LOW\_W;$

$IND62\_MEDW = a23*d13 + a53*d13*MED\_W + a23*d33*MED\_W + a53*d33*MED\_W*MED\_W;$

$IND62\_HIW = a23*d13 + a53*d13*HIGH\_W + a23*d33*HIGH\_W + a53*d33*HIGH\_W*HIGH\_W;$

! Y2 ON X - Calc conditional total effects for each combination of moderator value

$TOT22\_LOWW = IND42\_LOWW + IND52\_LOWW + IND62\_LOWW + edash2;$

$TOT22\_MEDW = IND42\_MEDW + IND52\_MEDW + IND62\_MEDW + edash2;$

$TOT22\_HIW = IND42\_HIW + IND52\_HIW + IND62\_HIW + edash2;$

## OUTPUT:

stand cint(bcbootstrap);

Table S6

*Correlations between the study variables*

|   |                                   | 1               | 2      | 3      | 4      | 5      | 6      | 7      | 8      | 9 | 10 | 11 | 12 |
|---|-----------------------------------|-----------------|--------|--------|--------|--------|--------|--------|--------|---|----|----|----|
| 1 | Age (T1)                          |                 |        |        |        |        |        |        |        |   |    |    |    |
| 2 | ICT Use for Task Functions (T1)   | <i>r</i>        | -.045  |        |        |        |        |        |        |   |    |    |    |
|   |                                   | Sig. (2-tailed) | .061   |        |        |        |        |        |        |   |    |    |    |
|   |                                   | <i>N</i>        | 1761   |        |        |        |        |        |        |   |    |    |    |
| 3 | ICT Use for Social Functions (T1) | <i>r</i>        | -.051* | .774** |        |        |        |        |        |   |    |    |    |
|   |                                   | Sig. (2-tailed) | .032   | .000   |        |        |        |        |        |   |    |    |    |
|   |                                   | <i>N</i>        | 1761   | 1761   |        |        |        |        |        |   |    |    |    |
| 4 | Job Autonomy (T1)                 | <i>r</i>        | .030   | .249** | .263** |        |        |        |        |   |    |    |    |
|   |                                   | Sig. (2-tailed) | .216   | <.001  | <.001  |        |        |        |        |   |    |    |    |
|   |                                   | <i>N</i>        | 1761   | 1761   | 1761   |        |        |        |        |   |    |    |    |
| 5 | Team Cohesion (T1)                | <i>r</i>        | .061** | .207** | .199** | .140** |        |        |        |   |    |    |    |
|   |                                   | Sig. (2-tailed) | .010   | <.001  | <.001  | <.001  |        |        |        |   |    |    |    |
|   |                                   | <i>N</i>        | 1761   | 1761   | 1761   | 1761   |        |        |        |   |    |    |    |
| 6 | Task Significance (T1)            | <i>r</i>        | .065** | .170** | .180** | .259** | .271** |        |        |   |    |    |    |
|   |                                   | Sig. (2-tailed) | .007   | <.001  | <.001  | <.001  | <.001  |        |        |   |    |    |    |
|   |                                   | <i>N</i>        | 1761   | 1761   | 1761   | 1761   | 1761   |        |        |   |    |    |    |
| 7 | Job Autonomy (T2)                 | <i>r</i>        | .029   | .187** | .199** | .685** | .095** | .192** |        |   |    |    |    |
|   |                                   | Sig. (2-tailed) | .217   | <.001  | <.001  | <.001  | <.001  | <.001  |        |   |    |    |    |
|   |                                   | <i>N</i>        | 1761   | 1761   | 1761   | 1761   | 1761   | 1761   |        |   |    |    |    |
| 8 | Team Cohesion (T2)                | <i>r</i>        | .093** | .175** | .168** | .166** | .679** | .259** | .165** |   |    |    |    |
|   |                                   | Sig. (2-tailed) | <.001  | <.001  | <.001  | <.001  | <.001  | <.001  | <.001  |   |    |    |    |
|   |                                   | <i>N</i>        | 1761   | 1761   | 1761   | 1761   | 1761   | 1761   | 1761   |   |    |    |    |

*Continued*



Table S6 *Continued*

|                          |                 | 1      | 2      | 3      | 4      | 5      | 6      | 7      | 8      | 9      | 10     | 11     | 12     |
|--------------------------|-----------------|--------|--------|--------|--------|--------|--------|--------|--------|--------|--------|--------|--------|
| 9 Task Significance (T2) | <i>r</i>        | .030   | .108** | .118** | .156** | .226** | .668** | .175** | .313** |        |        |        |        |
|                          | Sig. (2-tailed) | .202   | <.001  | <.001  | <.001  | <.001  | <.001  | <.001  | <.001  |        |        |        |        |
|                          | <i>N</i>        | 1761   | 1761   | 1761   | 1761   | 1761   | 1761   | 1761   | 1761   |        |        |        |        |
| 10 Task Proficiency (T2) | <i>r</i>        | .227** | .101** | .122** | .061*  | .311** | .214** | .074** | .354** | .229** |        |        |        |
|                          | Sig. (2-tailed) | <.001  | <.001  | <.001  | .010   | <.001  | <.001  | .002   | <.001  | <.001  |        |        |        |
|                          | <i>N</i>        | 1761   | 1761   | 1761   | 1761   | 1761   | 1761   | 1761   | 1761   | 1761   |        |        |        |
| 11 Job Satisfaction (T2) | <i>r</i>        | .084** | .088** | .099** | .274** | .315** | .232** | .309** | .393** | .255** | .287** |        |        |
|                          | Sig. (2-tailed) | <.001  | <.001  | <.001  | <.001  | <.001  | <.001  | <.001  | <.001  | <.001  | <.001  |        |        |
|                          | <i>N</i>        | 1760   | 1760   | 1760   | 1760   | 1760   | 1760   | 1760   | 1760   | 1760   | 1760   |        |        |
| 12 Task Proficiency (T3) | <i>r</i>        | .247** | .096** | .112** | .050   | .332** | .189** | .025   | .349** | .200** | .656** | .304** |        |
|                          | Sig. (2-tailed) | <.001  | <.001  | <.001  | .050   | <.001  | <.001  | .331   | <.001  | <.001  | <.001  | <.001  |        |
|                          | <i>N</i>        | 1528   | 1528   | 1528   | 1528   | 1528   | 1528   | 1528   | 1528   | 1528   | 1528   | 1527   |        |
| 13 Job Satisfaction (T3) | <i>r</i>        | .066** | .114** | .119** | .265** | .316** | .222** | .292** | .373** | .238** | .295** | .623** | .317** |
|                          | Sig. (2-tailed) | .010   | <.001  | <.001  | <.001  | <.001  | <.001  | <.001  | <.001  | <.001  | <.001  | <.001  | <.001  |
|                          | <i>N</i>        | 1526   | 1526   | 1526   | 1526   | 1526   | 1526   | 1526   | 1526   | 1526   | 1526   | 1525   | 1526   |

Note. \*, Correlation is significant at the 0.05 level (2-tailed); \*\*, Correlation is significant at the 0.01 level (2-tailed).
